# Supplementary material for: Molecular Relay Stations in Membrane Nanotubes: IRSp53 Involved in Actin-Based Force Generation
Source: Int J Mol Sci. 2023 Aug 23;24(17):13112. doi: 10.3390/ijms241713112 (PMC10487789; doi:10.3390/ijms241713112)
Supplement: Supplementary file 1 [file ijms-24-13112-s001.zip]

Archive with 6 entries (6 files):
- ijms-2516089-supplementary.pdf
- Video S1_Madarasz et al.avi
- Video S2_Madarasz et al.avi
- Video S3_Madarasz et al.avi
- Video S4_Madarasz et al.avi
- Video S5_Madarasz et al.avi
